# Supplementary material
Source: PubMed Central journal article supplement (PMC3606820)

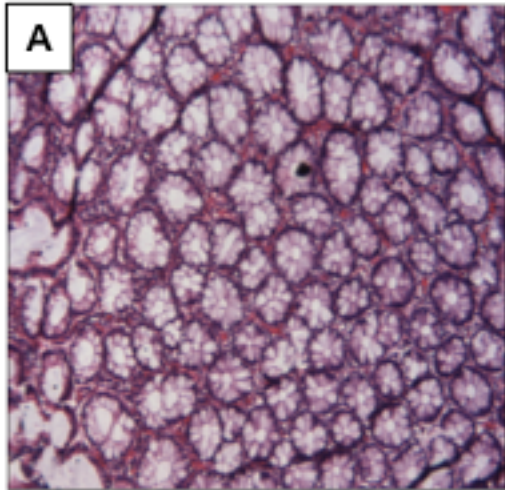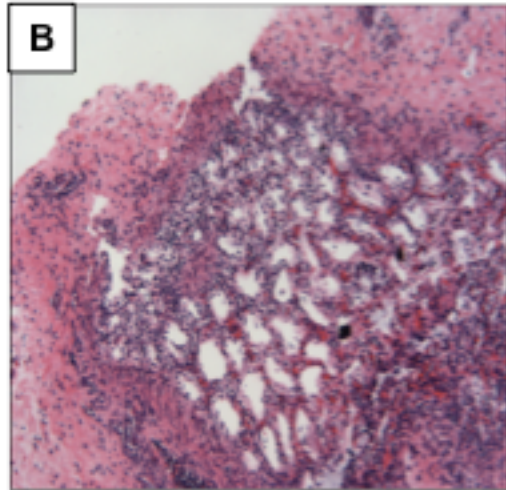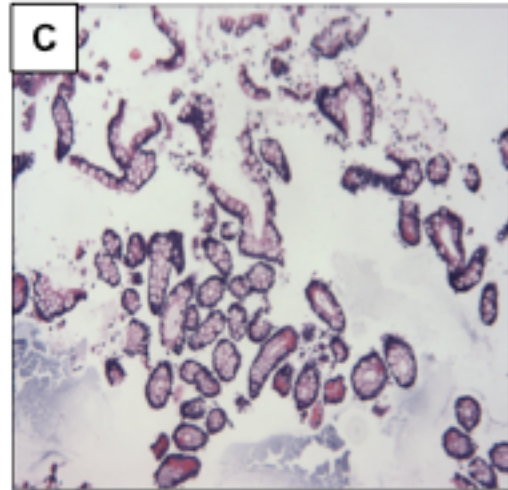

Supplement: NIHMS435174-supplement-Figure_S1.pdf [file NIHMS435174-supplement-Figure_S1.pdf]
